# Supplementary material
Source: publisher figshare collection journal article supplement (https://gsajournals.figshare.com/ndownloader/files/25468379)
Supplement: Supplementary file 1 [file 25468379]

**Table S3. Primers used in this study**

| **Primer name** | **Sequence 5’-3’** | **Description** |
| --- | --- | --- |
| 298 | CGAGCTCCCAAATCTGTCCA | Amplification of HygB resistance cassette from vector pAN7-1; (forward) |
| 299 | GTGTACCTGTGCATTCTGGG | Amplification of HygB resistance from vector pAN7-1; (reverse) |
| 614 | CGGCATCAGAGCAGATTGTAC | Amplification of clonNAT resistance cassette from vector pRS41N; (forward) |
| 615 | GGTATTTCACACCGCACAGG | Amplification of clonNAT resistance cassette from vector pRS41N; (reverse) |
| 1069 | TGTCCAAGCAGCAAAGAGTG | HygR insertion check; (forward) |
| 1070 | TTTCATACACCGGGCAAAGC | HygR insertion check; (reverse) |
| 1495 | GTGTGGAATTGTGAGCGGATAAC | Amplification of G418 resistance cassette from vector pUMa1057; (forward) |
| 1496 | GATGTGCTGCAAGGCGATTAAG | Amplification of G418 resistance cassette from vector pUMa1057; (reverse) |
| 2195 | CCACCGATGAAGGCTGAGAG | *FUS3* deletion in A.o (5' flanking, forward) |
| 2196 | GTACAATCTGCTCTGATGCCGCAATCGGTACGGAGGAGCTTC | *FUS3* deletion in A.o (5' flanking, reverse) |
| 2197 | CCTGTGCGGTGTGAAATACCGAAGAATTTGGGACACGCAGC | *FUS3* deletion in A.o (3' flanking, forward) |
| 2198 | AGCCAGATCGCACCAGATTC | *FUS3* deletion in A.o (3' flanking, reverse) |
| 2199 | AGTAGTAGCCACCATGTCTCG | *FUS3* deletion check (internal, forward) |
| 2200 | TTCCAATCCACTCAATCCAATATCC | *FUS3* deletion check (internal, reverse) |
| 2201 | TCGAGATAGTGCCCTGCAAG | *FUS3* deletion check (cassette integration, forward) |
| 2202 | CTCCCAAGACCCAGACACAC | *STE12* deletion in A.o (5' flanking, forward) |
| 2203 | GTACAATCTGCTCTGATGCCGCCGGCTCTTCTATCTGTCGAATG | *STE12* deletion in A.o (5' flanking, reverse) |
| 2204 | CCTGTGCGGTGTGAAATACCACTATCACGATGTTCACGGACC | *STE12* deletion in A.o (3' flanking, forward) |
| 2205 | GATTCGGTGGGTCTTCGGTC | *STE12* deletion in A.o (3' flanking, reverse) |
| 2206 | ACGTATCTTACACGCGATCCAG | *STE12* deletion check (internal, forward) |
| 2207 | TTGACAAAGCACTCAAAGCAGC | *STE12* deletion check (internal, reverse) |
| 2208 | CGCTTGAGCTTTCTTGATTCTGG | *STE12* deletion check (cassette integration, forward) |
| 2209 | CTGATTCTCGGGCAGCCAAG | *IME2* deletion in A.o (5' flanking, forward) |
| 2210 | GTACAATCTGCTCTGATGCCGACGAAACGGGCAATCGGAAG | *IME2* deletion in A.o (5' flanking, reverse) |
| 2211 | CCTGTGCGGTGTGAAATACCACTGCCTATGCTGGATCGAAG | *IME2* deletion in A.o (3' flanking, forward) |
| 2212 | AACACACGAATGTCTCATCCAACC | *IME2* deletion in A.o (3' flanking, reverse) |
| 2213 | TCTAACCAGCTCTGCACGAC | *IME2* deletion check (internal, forward) |
| 2214 | GTGTTGTGCTCGCCAAAGTG | *IME2* deletion check (internal, reverse) |
| 2215 | CGAGTTCAGACTGTCGGCTTC | *IME2* deletion check (cassette integration, forward) |
| 2216 | CCGAGACTACAATCCGTCTAC | *SLT2* deletion in A.o (5' flanking, forward) |
| 2217 | TGGACAGATTTGGGAGCTCGCAGTATACCGCTCATCGACG | *SLT2* deletion in A.o (5' flanking, reverse) |
| 2218 | CCCAGAATGCACAGGTACACCGGAGTTGGCTGGTGGATTG | *SLT2* deletion in A.o (3' flanking, forward) |
| 2219 | ATCATCATCCTCATCGTCACTG | *SLT2* deletion in A.o (3' flanking, reverse) |
| 2220 | ACCGGAAGCTATTCAGAGTC | *SLT2* deletion check (internal, forward) |
| 2221 | AGCTTGTCTCTCTGGGATTC | *SLT2* deletion check (internal, reverse) |
| 2222 | TTAATAGCCCTGTACCAACTCGTG | *SLT2* deletion check (cassette integration, forward) |
| 402 | CCCACCGAATTACCGATTCC | *BCK1* deletion in A.o (5' flanking, forward) |
| 403 | GCTCCAGCCAAGCCCAAAAAATATGCGATCCTACGCCCTC | *BCK1* deletion in A.o (5' flanking, reverse) |
| 404 | CGTCCGAGGGCAAAGGAATAGAACAACAAGCTCCAGAGACAAG | *BCK1* deletion in A.o (3' flanking, forward) |
| 405 | TCTTGCTTCAAGGCTGTTCG | *BCK1* deletion in A.o (3' flanking, reverse) |
| 474 | AGCCGTCTAGCCATGATGTC | *BCK1* deletion check (cassette integration, forward) |
| 426 | ATCTAGCGAAGCAGTTGCAG | *BCK1* deletion check (internal, forward) |
| 427 | ACGACAGTGACGACTTCTTC | *BCK1* deletion check (internal, reverse) |
| 211 | CCGCCTCTCGATCAAAGTACC | *STE7* deletion in A.o (5' flanking, forward) |
| 350 | GCTCCAGCCAAGCCCAAAAATAGAGGAGAGGAAGAGGGTC | *STE7* deletion in A.o (5' flanking, reverse) |
| 351 | CGTCCGAGGGCAAAGGAATAGGCTTCATAAACTAGCGCGAG | *STE7* deletion in A.o (3' flanking, forward) |
| 214 | CGCATGGGTGGAATACAGGAG | *STE7* deletion in A.o (3' flanking, reverse) |
| 217 | ATGGCTGCCGACCAGTTTGC | *STE7* deletion check (internal, forward) |
| 218 | TTTAGGTTTCCTTTGTGCACCAA | *STE7* deletion check (internal, reverse) |
| 471 | TTTCTTCTGCTTCTTGCTGC | *STE7* deletion check (cassette integration, forward) |
